# Supplementary material for: H3P···AgI: generation by laser-ablation and characterization by rotational spectroscopy and ab initio calculations
Source: Phys Chem Chem Phys. 2016 Jun 20;18(28):18971–7. doi: 10.1039/c6cp03512d (PMC5044702; doi:10.1039/c6cp03512d)
Supplement: Supplementary file 1 [file CP-018-C6CP03512D-s001.log]

H3P...AgI: Generation by laser-ablation and characterization by rotational spectroscopy and ab initio calculations

Susanna L Stephens, David P Tew, Nicholas R Walker, and Anthony C Legon,

SUPPLEMENTARY MATERIAL 1  FINAL CYCLE OF THE FIT FO TRANSITION FREQUENCIES OF H3P...107AgI USING PGOPHER


Pgopher 8.0.169 24 Jan 2014 9:23 32 bit (Delphi 18.5/18)
Mixture: 107AgI_PH3_nick.pgo
  Units               MHz
  PrintLevel          Detail
  Precision           4
  BasisOrder          boDefault
  QuantumNumberFormat J
  FitCycles           1
  FitDetails          False
  AutoReplot          True
  AllowComplex        False
  NoLineList          False
  ShowEstUnc          False
  ShowDerivatives     False
  SVDlimit            5
  SVDThresh    1E-15
  ScaleChanges 1
  Species: PhH3_CF3I
    Jmax 30
    Concentration 1
  Species: PH3_AgI
    Jmax   30
    Colour Orange
    Concentration 1
    AsymmetricMolecule: PH3_AgI PH3_107AgI
      nNuclei        1
      JAdjustSym     False
      BlockMatrix    True
      PointGroup     C2v
      Representation Ir
      SReduction     False
      eeWt           1
      eoWt           1
      oeWt           1
      ooWt           1
      C2zAxis        a
      C2xAxis        c
      PseudoC2v      False
      FakeSym        False
      PhaseAdjust    False
      Abundance 1
      AsymmetricManifold: PH3_AgI Ground
        Initial       True
        EigenSearch   True
        LimitSearch   True
        AutoQConverge True
        UsePopParams  False
        AsymmetricTop: PH3_AgI v=0
          Symmetry A1
          Kmin     0
          Kmax     1
          A    6000
          BBar 626.013073579357           Float
          DJK  0.00446205450684256        Float
          DJ   3.18215437576852E-5        Float
          AsymmetricTopNucleus: PH3_AgI I
            Spin   2.5
            AsNext False
            CHIzz -733.832429702127          Float
        <N  ,K  |A|N,K> = K^2
        <N  ,K  |BBar|N,K> = N*(N+1)-K^2
        <N  ,K  |DJK|N,K> = -N*(N+1)*K^2
        <N  ,K  |DJ|N,K> = -N^2*(N+1)^2
      TransitionMoments: PH3_AgI <Ground|mu|Ground>
        CartesianTransitionMoment: PH3_AgI <v=0|a|v=0>
          Axis a
          Strength 1
        Symbolic Matrix Elements not available for <v=0|a|v=0>
  Species: PH3_109AgI
    Jmax   30
    Colour Red
    Concentration 1
    AsymmetricMolecule: PH3_109AgI PH3_109AgI
      nNuclei        1
      JAdjustSym     False
      BlockMatrix    True
      PointGroup     C2v
      Representation Ir
      SReduction     False
      eeWt           1
      eoWt           1
      oeWt           1
      ooWt           1
      C2zAxis        a
      C2xAxis        c
      PseudoC2v      False
      FakeSym        False
      PhaseAdjust    False
      Abundance 1
      AsymmetricManifold: PH3_109AgI Ground
        Initial       True
        EigenSearch   True
        LimitSearch   True
        AutoQConverge True
        UsePopParams  False
        AsymmetricTop: PH3_109AgI v=0
          Symmetry A1
          Kmin     0
          Kmax     1
          A    6000
          BBar 624.764355297811
          DJK  0.00436248117994767
          DJ   3.19063236679847E-5
          AsymmetricTopNucleus: PH3_109AgI I
            Spin   2.5
            AsNext False
            CHIzz -734.433320949225
        <N  ,K  |A|N,K> = K^2
        <N  ,K  |BBar|N,K> = N*(N+1)-K^2
        <N  ,K  |DJK|N,K> = -N*(N+1)*K^2
        <N  ,K  |DJ|N,K> = -N^2*(N+1)^2
      TransitionMoments: PH3_109AgI <Ground|mu|Ground>
        CartesianTransitionMoment: PH3_109AgI <v=0|a|v=0>
          Axis a
          Strength 1
        Symbolic Matrix Elements not available for <v=0|a|v=0>


Residuals before fit for PH3_107AgI for the Ground manifold
    J'S'  #'    J"S"  #"     Observed    Calculated      Obs-Calc StdDev 
  4.5 A1  3   3.5 A2  3     7502.0500     7502.0691       -0.0191 1       .00032      0 : qR0,5(5)4.5,3.5 : PH3_107AgI v=0  6  0  6 4.5 - v=0  5  0  5 3.5 : s_1-2dCF3I_1-2dPhH3_Ag_46611_191211.csv - Overlays       :   1:<LineList>
  5.5 A1  2   4.5 A2  2     7504.7500     7504.7432        0.0068 1       .00039      0 : qR0,5(5)5.5,4.5 : PH3_107AgI v=0  6  0  6 5.5 - v=0  5  0  5 4.5 : s_1-2dCF3I_1-2dPhH3_Ag_46611_191211.csv - Overlays       :   2:<LineList>
  6.5 B1  3   5.5 B2  3     7509.2000     7509.1857        0.0143 1       .00036      0 : qR1,4(5)6.5,5.5 : PH3_107AgI v=0  6  1  5 6.5 - v=0  5  1  4 5.5 : s_1-2dCF3I_1-2dPhH3_Ag_46611_191211.csv - Overlays       :   3:<LineList>
  6.5 B2  3   5.5 B1  3     7509.2000     7509.1857        0.0143 1       .00036      0 : qR1,5(5)6.5,5.5 : PH3_107AgI v=0  6  1  6 6.5 - v=0  5  1  5 5.5 : s_1-2dCF3I_1-2dPhH3_Ag_46611_191211.csv - Overlays       :   4:<LineList>
  6.5 A1  2   5.5 A2  2     7511.4500     7511.4445        0.0055 1       .00047      0 : qR0,5(5)6.5,5.5 : PH3_107AgI v=0  6  0  6 6.5 - v=0  5  0  5 5.5 : s_1-2dCF3I_1-2dPhH3_Ag_46611_191211.csv - Overlays       :   5:<LineList>
  8.5 B2  1   7.5 B1  1     7516.9000     7516.8920        0.0080 1       .00051      0 : qR1,5(5)8.5,7.5 : PH3_107AgI v=0  6  1  6 8.5 - v=0  5  1  5 7.5 : s_1-2dCF3I_1-2dPhH3_Ag_46611_191211.csv - Overlays       :   6:<LineList>
  8.5 B1  1   7.5 B2  1     7516.9000     7516.8920        0.0080 1       .00051      0 : qR1,4(5)8.5,7.5 : PH3_107AgI v=0  6  1  5 8.5 - v=0  5  1  4 7.5 : s_1-2dCF3I_1-2dPhH3_Ag_46611_191211.csv - Overlays       :   7:<LineList>
  7.5 A1  1   6.5 A2  1     7517.3460     7517.3292        0.0168 1       .00057      0 : qR0,5(5)7.5,6.5 : PH3_107AgI v=0  6  0  6 7.5 - v=0  5  0  5 6.5 : s_1-2dCF3I_1-2dPhH3_Ag_46611_191211.csv - Overlays       :   8:<LineList>
  6.5 B2  4   5.5 B1  4     8758.6500     8758.6235        0.0265 1       .00029      0 : qR1,5(6)6.5,5.5 : PH3_107AgI v=0  7  1  6 6.5 - v=0  6  1  5 5.5 : s_1-2dCF3I_1-2dPhH3_Ag_46611_191211.csv - Overlays       :   9:<LineList>
  6.5 B1  4   5.5 B2  4     8758.6500     8758.6235        0.0265 1       .00029      0 : qR1,6(6)6.5,5.5 : PH3_107AgI v=0  7  1  7 6.5 - v=0  6  1  6 5.5 : s_1-2dCF3I_1-2dPhH3_Ag_46611_191211.csv - Overlays       :  10:<LineList>
  9.5 B2  1   8.5 B1  1     8767.5500     8767.5502       -0.0002 1       .00045      0 : qR1,5(6)9.5,8.5 : PH3_107AgI v=0  7  1  6 9.5 - v=0  6  1  5 8.5 : s_1-2dCF3I_1-2dPhH3_Ag_46611_191211.csv - Overlays       :  11:<LineList>
  9.5 B1  1   8.5 B2  1     8767.5500     8767.5502       -0.0002 1       .00045      0 : qR1,6(6)9.5,8.5 : PH3_107AgI v=0  7  1  7 9.5 - v=0  6  1  6 8.5 : s_1-2dCF3I_1-2dPhH3_Ag_46611_191211.csv - Overlays       :  12:<LineList>
  8.5 A2  1   7.5 A1  1     8768.1000     8768.1171       -0.0171 1       .00052      0 : qR0,6(6)8.5,7.5 : PH3_107AgI v=0  7  0  7 8.5 - v=0  6  0  6 7.5 : s_1-2dCF3I_1-2dPhH3_Ag_46611_191211.csv - Overlays       :  13:<LineList>
  6.5 A1  3   5.5 A2  3    10011.0000    10011.0055       -0.0055 1       .00029      0 : qR0,7(7)6.5,5.5 : PH3_107AgI v=0  8  0  8 6.5 - v=0  7  0  7 5.5 : s_1-2dCF3I_1-2dPhH3_Ag_46611_191211.csv - Overlays       :  14:<LineList>
  6.5 B1  5   5.5 B2  5    10011.4000    10011.3771        0.0229 1       .00022      0 : qR1,6(7)6.5,5.5 : PH3_107AgI v=0  8  1  7 6.5 - v=0  7  1  6 5.5 : s_1-2dCF3I_1-2dPhH3_Ag_46611_191211.csv - Overlays       :  15:<LineList>
  6.5 B2  5   5.5 B1  5    10011.4000    10011.3771        0.0229 1       .00022      0 : qR1,7(7)6.5,5.5 : PH3_107AgI v=0  8  1  8 6.5 - v=0  7  1  7 5.5 : s_1-2dCF3I_1-2dPhH3_Ag_46611_191211.csv - Overlays       :  16:<LineList>
  7.5 B2  4   6.5 B1  4    10012.1500    10012.1424        0.0076 1       .00025      0 : qR1,7(7)7.5,6.5 : PH3_107AgI v=0  8  1  8 7.5 - v=0  7  1  7 6.5 : s_1-2dCF3I_1-2dPhH3_Ag_46611_191211.csv - Overlays       :  17:<LineList>
  7.5 B1  4   6.5 B2  4    10012.1500    10012.1424        0.0076 1       .00025      0 : qR1,6(7)7.5,6.5 : PH3_107AgI v=0  8  1  7 7.5 - v=0  7  1  6 6.5 : s_1-2dCF3I_1-2dPhH3_Ag_46611_191211.csv - Overlays       :  18:<LineList>
  7.5 A1  2   6.5 A2  2    10012.6500    10012.6605       -0.0105 1       .00033      0 : qR0,7(7)7.5,6.5 : PH3_107AgI v=0  8  0  8 7.5 - v=0  7  0  7 6.5 : s_1-2dCF3I_1-2dPhH3_Ag_46611_191211.csv - Overlays       :  19:<LineList>
  5.5 A1  3   4.5 A2  3    10013.3000    10013.3123       -0.0123 1       .00025      0 : qR0,7(7)5.5,4.5 : PH3_107AgI v=0  8  0  8 5.5 - v=0  7  0  7 4.5 : s_1-2dCF3I_1-2dPhH3_Ag_46611_191211.csv - Overlays       :  20:<LineList>
  5.5 B2  6   4.5 B1  6    10014.6540    10014.6655       -0.0115 1       .00019      0 : qR1,7(7)5.5,4.5 : PH3_107AgI v=0  8  1  8 5.5 - v=0  7  1  7 4.5 : s_1-2dCF3I_1-2dPhH3_Ag_46611_191211.csv - Overlays       :  21:<LineList>
  5.5 B1  6   4.5 B2  6    10014.6540    10014.6655       -0.0115 1       .00019      0 : qR1,6(7)5.5,4.5 : PH3_107AgI v=0  8  1  7 5.5 - v=0  7  1  6 4.5 : s_1-2dCF3I_1-2dPhH3_Ag_46611_191211.csv - Overlays       :  22:<LineList>
  8.5 B2  3   7.5 B1  3    10015.2900    10015.2790        0.0110 1       .00029      0 : qR1,7(7)8.5,7.5 : PH3_107AgI v=0  8  1  8 8.5 - v=0  7  1  7 7.5 : s_1-2dCF3I_1-2dPhH3_Ag_46611_191211.csv - Overlays       :  23:<LineList>
  8.5 B1  3   7.5 B2  3    10015.2900    10015.2790        0.0110 1       .00029      0 : qR1,6(7)8.5,7.5 : PH3_107AgI v=0  8  1  7 8.5 - v=0  7  1  6 7.5 : s_1-2dCF3I_1-2dPhH3_Ag_46611_191211.csv - Overlays       :  24:<LineList>
  8.5 A1  2   7.5 A2  2    10016.3050    10016.3181       -0.0131 1       .00038      0 : qR0,7(7)8.5,7.5 : PH3_107AgI v=0  8  0  8 8.5 - v=0  7  0  7 7.5 : s_1-2dCF3I_1-2dPhH3_Ag_46611_191211.csv - Overlays       :  25:<LineList>
 10.5 A1  1   9.5 A2  1    10017.9000    10017.9104       -0.0104 1       .00048      0 : qR0,7(7)10.5,9.5 : PH3_107AgI v=0  8  0  8 10.5 - v=0  7  0  7 9.5 : s_1-2dCF3I_1-2dPhH3_Ag_46611_191211.csv - Overlays     :  26:<LineList>
  9.5 B2  2   8.5 B1  2    10018.4780    10018.4731        0.0049 1       .00033      0 : qR1,7(7)9.5,8.5 : PH3_107AgI v=0  8  1  8 9.5 - v=0  7  1  7 8.5 : s_1-2dCF3I_1-2dPhH3_Ag_46611_191211.csv - Overlays       :  27:<LineList>
  9.5 B1  2   8.5 B2  2    10018.4780    10018.4731        0.0049 1       .00033      0 : qR1,6(7)9.5,8.5 : PH3_107AgI v=0  8  1  7 9.5 - v=0  7  1  6 8.5 : s_1-2dCF3I_1-2dPhH3_Ag_46611_191211.csv - Overlays       :  28:<LineList>
 10.5 B2  1   9.5 B1  1    10018.7000    10018.6902        0.0098 1       .00037      0 : qR1,7(7)10.5,9.5 : PH3_107AgI v=0  8  1  8 10.5 - v=0  7  1  7 9.5 : s_1-2dCF3I_1-2dPhH3_Ag_46611_191211.csv - Overlays     :  29:<LineList>
 10.5 B1  1   9.5 B2  1    10018.7000    10018.6902        0.0098 1       .00037      0 : qR1,6(7)10.5,9.5 : PH3_107AgI v=0  8  1  7 10.5 - v=0  7  1  6 9.5 : s_1-2dCF3I_1-2dPhH3_Ag_46611_191211.csv - Overlays     :  30:<LineList>
  7.5 A2  3   6.5 A1  3    11264.2000    11264.2064       -0.0064 1       .00023      0 : qR0,8(8)7.5,6.5 : PH3_107AgI v=0  9  0  9 7.5 - v=0  8  0  8 6.5 : s_1-2dCF3I_1-2dPhH3_Ag_46611_191211.csv - Overlays       :  31:<LineList>
  7.5 B2  5   6.5 B1  5    11264.3700    11264.3783       -0.0083 1       .00017      0 : qR1,7(8)7.5,6.5 : PH3_107AgI v=0  9  1  8 7.5 - v=0  8  1  7 6.5 : s_1-2dCF3I_1-2dPhH3_Ag_46611_191211.csv - Overlays       :  32:<LineList>
  7.5 B1  5   6.5 B2  5    11264.3700    11264.3783       -0.0083 1       .00017      0 : qR1,8(8)7.5,6.5 : PH3_107AgI v=0  9  1  9 7.5 - v=0  8  1  8 6.5 : s_1-2dCF3I_1-2dPhH3_Ag_46611_191211.csv - Overlays       :  33:<LineList>
  8.5 B2  4   7.5 B1  4    11265.1080    11265.1186       -0.0106 1       .0002      0 : qR1,7(8)8.5,7.5 : PH3_107AgI v=0  9  1  8 8.5 - v=0  8  1  7 7.5 : s_1-2dCF3I_1-2dPhH3_Ag_46611_191211.csv - Overlays        :  34:<LineList>
  8.5 B1  4   7.5 B2  4    11265.1080    11265.1186       -0.0106 1       .0002      0 : qR1,8(8)8.5,7.5 : PH3_107AgI v=0  9  1  9 8.5 - v=0  8  1  8 7.5 : s_1-2dCF3I_1-2dPhH3_Ag_46611_191211.csv - Overlays        :  35:<LineList>
  8.5 A2  2   7.5 A1  2    11265.5500    11265.5561       -0.0061 1       .00026      0 : qR0,8(8)8.5,7.5 : PH3_107AgI v=0  9  0  9 8.5 - v=0  8  0  8 7.5 : s_1-2dCF3I_1-2dPhH3_Ag_46611_191211.csv - Overlays       :  36:<LineList>
  6.5 A2  3   5.5 A1  3    11265.9730    11265.9723        0.0007 1       .0002      0 : qR0,8(8)6.5,5.5 : PH3_107AgI v=0  9  0  9 6.5 - v=0  8  0  8 5.5 : s_1-2dCF3I_1-2dPhH3_Ag_46611_191211.csv - Overlays        :  37:<LineList>
  6.5 B2  6   5.5 B1  6    11266.8510    11266.8583       -0.0073 1       .00015      0 : qR1,7(8)6.5,5.5 : PH3_107AgI v=0  9  1  8 6.5 - v=0  8  1  7 5.5 : s_1-2dCF3I_1-2dPhH3_Ag_46611_191211.csv - Overlays       :  38:<LineList>
  6.5 B1  6   5.5 B2  6    11266.8510    11266.8583       -0.0073 1       .00015      0 : qR1,8(8)6.5,5.5 : PH3_107AgI v=0  9  1  9 6.5 - v=0  8  1  8 5.5 : s_1-2dCF3I_1-2dPhH3_Ag_46611_191211.csv - Overlays       :  39:<LineList>
  9.5 B2  3   8.5 B1  3    11267.6500    11267.6598       -0.0098 1       .00022      0 : qR1,7(8)9.5,8.5 : PH3_107AgI v=0  9  1  8 9.5 - v=0  8  1  7 8.5 : s_1-2dCF3I_1-2dPhH3_Ag_46611_191211.csv - Overlays       :  40:<LineList>
  9.5 B1  3   8.5 B2  3    11267.6500    11267.6598       -0.0098 1       .00022      0 : qR1,8(8)9.5,8.5 : PH3_107AgI v=0  9  1  9 9.5 - v=0  8  1  8 8.5 : s_1-2dCF3I_1-2dPhH3_Ag_46611_191211.csv - Overlays       :  41:<LineList>
  9.5 A2  2   8.5 A1  2    11268.4140    11268.4224       -0.0084 1       .00029      0 : qR0,8(8)9.5,8.5 : PH3_107AgI v=0  9  0  9 9.5 - v=0  8  0  8 8.5 : s_1-2dCF3I_1-2dPhH3_Ag_46611_191211.csv - Overlays       :  42:<LineList>
 11.5 A2  1  10.5 A1  1    11269.5760    11269.5705        0.0055 1       .00036      0 : qR0,8(8)11.5,10.5 : PH3_107AgI v=0  9  0  9 11.5 - v=0  8  0  8 10.5 : s_1-2dCF3I_1-2dPhH3_Ag_46611_191211.csv - Overlays   :  43:<LineList>
 10.5 B2  2   9.5 B1  2    11270.1040    11270.1234       -0.0194 1       .00025      0 : qR1,7(8)10.5,9.5 : PH3_107AgI v=0  9  1  8 10.5 - v=0  8  1  7 9.5 : s_1-2dCF3I_1-2dPhH3_Ag_46611_191211.csv - Overlays     :  44:<LineList>
 10.5 B1  2   9.5 B2  2    11270.1040    11270.1234       -0.0194 1       .00025      0 : qR1,8(8)10.5,9.5 : PH3_107AgI v=0  9  1  9 10.5 - v=0  8  1  8 9.5 : s_1-2dCF3I_1-2dPhH3_Ag_46611_191211.csv - Overlays     :  45:<LineList>
 10.5 A2  1   9.5 A1  1    11270.7000    11270.6853        0.0147 1       .00032      0 : qR0,8(8)10.5,9.5 : PH3_107AgI v=0  9  0  9 10.5 - v=0  8  0  8 9.5 : s_1-2dCF3I_1-2dPhH3_Ag_46611_191211.csv - Overlays     :  46:<LineList>
  9.5 B1  4   8.5 B2  4    12517.7690    12517.7706       -0.0016 1       .00014      0 : qR1,8(9)9.5,8.5 : PH3_107AgI v=0 10  1  9 9.5 - v=0  9  1  8 8.5 : s_1-2dCF3I_1-2dPhH3_Ag_46611_191211.csv - Overlays       :  48:<LineList>
  9.5 B2  4   8.5 B1  4    12517.7690    12517.7706       -0.0016 1       .00014      0 : qR1,9(9)9.5,8.5 : PH3_107AgI v=0 10  1 10 9.5 - v=0  9  1  9 8.5 : s_1-2dCF3I_1-2dPhH3_Ag_46611_191211.csv - Overlays       :  49:<LineList>
  9.5 A1  2   8.5 A2  2    12518.1500    12518.1440        0.0060 1       .00018      0 : qR0,9(9)9.5,8.5 : PH3_107AgI v=0 10  0 10 9.5 - v=0  9  0  9 8.5 : s_1-2dCF3I_1-2dPhH3_Ag_46611_191211.csv - Overlays       :  50:<LineList>
  7.5 A1  3   6.5 A2  3    12518.4000    12518.4179       -0.0179 1       .00015      0 : qR0,9(9)7.5,6.5 : PH3_107AgI v=0 10  0 10 7.5 - v=0  9  0  9 6.5 : s_1-2dCF3I_1-2dPhH3_Ag_46611_191211.csv - Overlays       :  51:<LineList>
 10.5 B1  3   9.5 B2  3    12519.8500    12519.8654       -0.0154 1       .00015      0 : qR1,8(9)10.5,9.5 : PH3_107AgI v=0 10  1  9 10.5 - v=0  9  1  8 9.5 : s_1-2dCF3I_1-2dPhH3_Ag_46611_191211.csv - Overlays     :  52:<LineList>
 10.5 B2  3   9.5 B1  3    12519.8500    12519.8654       -0.0154 1       .00015      0 : qR1,9(9)10.5,9.5 : PH3_107AgI v=0 10  1 10 10.5 - v=0  9  1  9 9.5 : s_1-2dCF3I_1-2dPhH3_Ag_46611_191211.csv - Overlays     :  53:<LineList>
 10.5 A1  2   9.5 A2  2    12520.4500    12520.4520       -0.0020 1       .0002      0 : qR0,9(9)10.5,9.5 : PH3_107AgI v=0 10  0 10 10.5 - v=0  9  0  9 9.5 : s_1-2dCF3I_1-2dPhH3_Ag_46611_191211.csv - Overlays      :  54:<LineList>
 12.5 A1  1  11.5 A2  1    12521.3000    12521.3125       -0.0125 1       .00025      0 : qR0,9(9)12.5,11.5 : PH3_107AgI v=0 10  0 10 12.5 - v=0  9  0  9 11.5 : s_1-2dCF3I_1-2dPhH3_Ag_46611_191211.csv - Overlays   :  55:<LineList>
 12.5 B2  1  11.5 B1  1    12521.6740    12521.6787       -0.0047 1       .00019      0 : qR1,9(9)12.5,11.5 : PH3_107AgI v=0 10  1 10 12.5 - v=0  9  1  9 11.5 : s_1-2dCF3I_1-2dPhH3_Ag_46611_191211.csv - Overlays   :  56:<LineList>
 12.5 B1  1  11.5 B2  1    12521.6740    12521.6787       -0.0047 1       .00019      0 : qR1,8(9)12.5,11.5 : PH3_107AgI v=0 10  1  9 12.5 - v=0  9  1  8 11.5 : s_1-2dCF3I_1-2dPhH3_Ag_46611_191211.csv - Overlays   :  57:<LineList>
 11.5 A1  1  10.5 A2  1    12522.2500    12522.2348        0.0152 1       .00022      0 : qR0,9(9)11.5,10.5 : PH3_107AgI v=0 10  0 10 11.5 - v=0  9  0  9 10.5 : s_1-2dCF3I_1-2dPhH3_Ag_46611_191211.csv - Overlays   :  58:<LineList>
  9.5 B2  5   8.5 B1  5    13769.6000    13769.5924        0.0076 1       8.3e-5      0 : qR1,9(10)9.5,8.5 : PH3_107AgI v=0 11  1 10 9.5 - v=0 10  1  9 8.5 : s_1-2dCF3I_1-2dPhH3_Ag_46611_191211.csv - Overlays      :  59:<LineList>
  9.5 A2  3   8.5 A1  3    13769.6000    13769.5971        0.0029 1       .00011      0 : qR0,10(10)9.5,8.5 : PH3_107AgI v=0 11  0 11 9.5 - v=0 10  0 10 8.5 : s_1-2dCF3I_1-2dPhH3_Ag_46611_191211.csv - Overlays     :  60:<LineList>
  9.5 B1  5   8.5 B2  5    13769.6000    13769.5924        0.0076 1       8.3e-5      0 : qR1,10(10)9.5,8.5 : PH3_107AgI v=0 11  1 11 9.5 - v=0 10  1 10 8.5 : s_1-2dCF3I_1-2dPhH3_Ag_46611_191211.csv - Overlays     :  61:<LineList>
 10.5 B2  4   9.5 B1  4    13770.2000    13770.2174       -0.0174 1       9.1e-5      0 : qR1,9(10)10.5,9.5 : PH3_107AgI v=0 11  1 10 10.5 - v=0 10  1  9 9.5 : s_1-2dCF3I_1-2dPhH3_Ag_46611_191211.csv - Overlays    :  62:<LineList>
 10.5 B1  4   9.5 B2  4    13770.2000    13770.2174       -0.0174 1       9.1e-5      0 : qR1,10(10)10.5,9.5 : PH3_107AgI v=0 11  1 11 10.5 - v=0 10  1 10 9.5 : s_1-2dCF3I_1-2dPhH3_Ag_46611_191211.csv - Overlays   :  63:<LineList>
 10.5 A2  2   9.5 A1  2    13770.5500    13770.5430        0.0070 1       .00012      0 : qR0,10(10)10.5,9.5 : PH3_107AgI v=0 11  0 11 10.5 - v=0 10  0 10 9.5 : s_1-2dCF3I_1-2dPhH3_Ag_46611_191211.csv - Overlays   :  64:<LineList>
 11.5 B2  3  10.5 B1  3    13771.9820    13771.9709        0.0111 1       .0001      0 : qR1,9(10)11.5,10.5 : PH3_107AgI v=0 11  1 10 11.5 - v=0 10  1  9 10.5 : s_1-2dCF3I_1-2dPhH3_Ag_46611_191211.csv - Overlays   :  65:<LineList>
 11.5 B1  3  10.5 B2  3    13771.9820    13771.9709        0.0111 1       .0001      0 : qR1,10(10)11.5,10.5 : PH3_107AgI v=0 11  1 11 11.5 - v=0 10  1 10 10.5 : s_1-2dCF3I_1-2dPhH3_Ag_46611_191211.csv - Overlays  :  66:<LineList>
 11.5 A2  2  10.5 A1  2    13772.4500    13772.4420        0.0080 1       .00013      0 : qR0,10(10)11.5,10.5 : PH3_107AgI v=0 11  0 11 11.5 - v=0 10  0 10 10.5 : s_1-2dCF3I_1-2dPhH3_Ag_46611_191211.csv - Overlays :  67:<LineList>
 13.5 A2  1  12.5 A1  1    13773.1000    13773.1070       -0.0070 1       .00016      0 : qR0,10(10)13.5,12.5 : PH3_107AgI v=0 11  0 11 13.5 - v=0 10  0 10 12.5 : s_1-2dCF3I_1-2dPhH3_Ag_46611_191211.csv - Overlays :  68:<LineList>
 13.5 B2  1  12.5 B1  1    13773.3500    13773.3567       -0.0067 1       .00012      0 : qR1,9(10)13.5,12.5 : PH3_107AgI v=0 11  1 10 13.5 - v=0 10  1  9 12.5 : s_1-2dCF3I_1-2dPhH3_Ag_46611_191211.csv - Overlays  :  69:<LineList>
 13.5 B1  1  12.5 B2  1    13773.3500    13773.3567       -0.0067 1       .00012      0 : qR1,10(10)13.5,12.5 : PH3_107AgI v=0 11  1 11 13.5 - v=0 10  1 10 12.5 : s_1-2dCF3I_1-2dPhH3_Ag_46611_191211.csv - Overlays :  70:<LineList>
 12.5 B2  2  11.5 B1  2    13773.5500    13773.5518       -0.0018 1       .00011      0 : qR1,9(10)12.5,11.5 : PH3_107AgI v=0 11  1 10 12.5 - v=0 10  1  9 11.5 : s_1-2dCF3I_1-2dPhH3_Ag_46611_191211.csv - Overlays  :  71:<LineList>
 12.5 B1  2  11.5 B2  2    13773.5500    13773.5518       -0.0018 1       .00011      0 : qR1,10(10)12.5,11.5 : PH3_107AgI v=0 11  1 11 12.5 - v=0 10  1 10 11.5 : s_1-2dCF3I_1-2dPhH3_Ag_46611_191211.csv - Overlays :  72:<LineList>
 12.5 A2  1  11.5 A1  1    13773.9000    13773.8826        0.0174 1       .00014      0 : qR0,10(10)12.5,11.5 : PH3_107AgI v=0 11  0 11 12.5 - v=0 10  0 10 11.5 : s_1-2dCF3I_1-2dPhH3_Ag_46611_191211.csv - Overlays :  73:<LineList>
 12.5 B1  3  11.5 B2  3    15024.0080    15024.0151       -0.0071 1       6e-5      0 : qR1,10(11)12.5,11.5 : PH3_107AgI v=0 12  1 11 12.5 - v=0 11  1 10 11.5 : s_1-2dCF3I_1-2dPhH3_Ag_46611_191211.csv - Overlays   :  74:<LineList>
 12.5 B2  3  11.5 B1  3    15024.0080    15024.0151       -0.0071 1       6e-5      0 : qR1,11(11)12.5,11.5 : PH3_107AgI v=0 12  1 12 12.5 - v=0 11  1 11 11.5 : s_1-2dCF3I_1-2dPhH3_Ag_46611_191211.csv - Overlays   :  75:<LineList>
 12.5 A1  2  11.5 A2  2    15024.4000    15024.4085       -0.0085 1       7.9e-5      0 : qR0,11(11)12.5,11.5 : PH3_107AgI v=0 12  0 12 12.5 - v=0 11  0 11 11.5 : s_1-2dCF3I_1-2dPhH3_Ag_46611_191211.csv - Overlays :  76:<LineList>
 14.5 A1  1  13.5 A2  1    15024.9500    15024.9355        0.0145 1       9.2e-5      0 : qR0,11(11)14.5,13.5 : PH3_107AgI v=0 12  0 12 14.5 - v=0 11  0 11 13.5 : s_1-2dCF3I_1-2dPhH3_Ag_46611_191211.csv - Overlays :  77:<LineList>
 14.5 B2  1  13.5 B1  1    15025.1000    15025.1000        0.0000 1       7.1e-5      0 : qR1,11(11)14.5,13.5 : PH3_107AgI v=0 12  1 12 14.5 - v=0 11  1 11 13.5 : s_1-2dCF3I_1-2dPhH3_Ag_46611_191211.csv - Overlays :  78:<LineList>
 14.5 B1  1  13.5 B2  1    15025.1000    15025.1000        0.0000 1       7.1e-5      0 : qR1,10(11)14.5,13.5 : PH3_107AgI v=0 12  1 11 14.5 - v=0 11  1 10 13.5 : s_1-2dCF3I_1-2dPhH3_Ag_46611_191211.csv - Overlays :  79:<LineList>
 13.5 B2  2  12.5 B1  2    15025.3440    15025.3196        0.0244 1       6.5e-5      0 : qR1,11(11)13.5,12.5 : PH3_107AgI v=0 12  1 12 13.5 - v=0 11  1 11 12.5 : s_1-2dCF3I_1-2dPhH3_Ag_46611_191211.csv - Overlays :  80:<LineList>
 13.5 B1  2  12.5 B2  2    15025.3440    15025.3196        0.0244 1       6.5e-5      0 : qR1,10(11)13.5,12.5 : PH3_107AgI v=0 12  1 11 13.5 - v=0 11  1 10 12.5 : s_1-2dCF3I_1-2dPhH3_Ag_46611_191211.csv - Overlays :  81:<LineList>
 13.5 A1  1  12.5 A2  1    15025.6000    15025.5968        0.0032 1       8.5e-5      0 : qR0,11(11)13.5,12.5 : PH3_107AgI v=0 12  0 12 13.5 - v=0 11  0 11 12.5 : s_1-2dCF3I_1-2dPhH3_Ag_46611_191211.csv - Overlays :  82:<LineList>
 11.5 A2  3  10.5 A1  3    16274.3260    16274.3085        0.0175 1       3.7e-5      0 : qR0,12(12)11.5,10.5 : PH3_107AgI v=0 13  0 13 11.5 - v=0 12  0 12 10.5 : s_1-2dCF3I_1-2dPhH3_Ag_46611_191211.csv - Overlays :  83:<LineList>
 10.5 B2  6   9.5 B1  6    16275.2690    16275.2723       -0.0033 1       2.6e-5      0 : qR1,11(12)10.5,9.5 : PH3_107AgI v=0 13  1 12 10.5 - v=0 12  1 11 9.5 : s_1-2dCF3I_1-2dPhH3_Ag_46611_191211.csv - Overlays   :  84:<LineList>
 10.5 B1  6   9.5 B2  6    16275.2690    16275.2723       -0.0033 1       2.6e-5      0 : qR1,12(12)10.5,9.5 : PH3_107AgI v=0 13  1 13 10.5 - v=0 12  1 12 9.5 : s_1-2dCF3I_1-2dPhH3_Ag_46611_191211.csv - Overlays   :  85:<LineList>
 13.5 B1  3  12.5 B2  3    16276.0150    16276.0186       -0.0036 1       3.4e-5      0 : qR1,12(12)13.5,12.5 : PH3_107AgI v=0 13  1 13 13.5 - v=0 12  1 12 12.5 : s_1-2dCF3I_1-2dPhH3_Ag_46611_191211.csv - Overlays :  86:<LineList>
 13.5 B2  3  12.5 B1  3    16276.0150    16276.0186       -0.0036 1       3.4e-5      0 : qR1,11(12)13.5,12.5 : PH3_107AgI v=0 13  1 12 13.5 - v=0 12  1 11 12.5 : s_1-2dCF3I_1-2dPhH3_Ag_46611_191211.csv - Overlays :  87:<LineList>
 13.5 A2  2  12.5 A1  2    16276.3500    16276.3590       -0.0090 1       4.4e-5      0 : qR0,12(12)13.5,12.5 : PH3_107AgI v=0 13  0 13 13.5 - v=0 12  0 12 12.5 : s_1-2dCF3I_1-2dPhH3_Ag_46611_191211.csv - Overlays :  88:<LineList>
 14.5 A2  1  13.5 A1  1    16277.3600    16277.3559        0.0041 1       4.7e-5      0 : qR0,12(12)14.5,13.5 : PH3_107AgI v=0 13  0 13 14.5 - v=0 12  0 12 13.5 : s_1-2dCF3I_1-2dPhH3_Ag_46611_191211.csv - Overlays :  89:<LineList>

88 Observations,  4 Parameters
Initial Average Error: 0.0119973196852901
Predicted New Error:   0.0119973196852597
Parameters:
  # Old                 New                 Std Dev   Change/Std Sens    Summary              Name
  1 626.013073579357    626.013073575019    .00022848    0.0000  1.54e-5 626.01307(23)        PH3_AgI v=0 BBar
  2 .00446205450684256  .00446205264926283  .00013667    0.0000  1.94e-5 4.46(14)e-3          PH3_AgI v=0 DJK
  3 3.18215437576852e-5 3.18215295447693e-5 8.9103e-7    0.0000  6.64e-8 3.182(89)e-5         PH3_AgI v=0 DJ
  4 -733.832429702127   -733.832428474743   .342948      0.0000  .077823 -733.83(34)          PH3_AgI I CHIzz

Correlation Matrix
       1       2       3       4
  1   1.000
  2   0.407   1.000
  3   0.878   0.031   1.000
  4  -0.227  -0.021  -0.203   1.000
