# Supplementary material for: H3P···AgI: generation by laser-ablation and characterization by rotational spectroscopy and ab initio calculations
Source: Phys Chem Chem Phys. 2016 Jun 20;18(28):18971–7. doi: 10.1039/c6cp03512d (PMC5044702; doi:10.1039/c6cp03512d)
Supplement: Supplementary file 2 [file CP-018-C6CP03512D-s002.log]

H3P...AgI: Generation by laser-ablation and characterization by rotational spectroscopy and ab initio calculations

Susanna L Stephens, David P Tew, Nicholas R Walker, and Anthony C Legon,

SUPPLEMENTARY MATERIAL 2  FINAL CYCLE OF THE FIT FO TRANSITION FREQUENCIES OF H3P...109AgI USING PGOPHER


Pgopher 8.0.169 24 Jan 2014 9:23 32 bit (Delphi 18.5/18)
Mixture: 109AgI_PH3_nick.pgo
  Units               MHz
  PrintLevel          Detail
  Precision           4
  BasisOrder          boDefault
  QuantumNumberFormat J
  FitCycles           1

  FitDetails          False
  AutoReplot          True
  AllowComplex        False
  NoLineList          False
  ShowEstUnc          False
  ShowDerivatives     False
  SVDlimit            5
  SVDThresh    1E-15
  ScaleChanges 1
  Species: PhH3_CF3I
    Jmax 30
    Concentration 1
  Species: PH3_AgI
    Jmax   30
    Colour Orange
    Concentration 1
    AsymmetricMolecule: PH3_AgI PH3_107AgI
      nNuclei        1
      JAdjustSym     False
      BlockMatrix    True
      PointGroup     C2v
      Representation Ir
      SReduction     False
      eeWt           1
      eoWt           1
      oeWt           1
      ooWt           1
      C2zAxis        a
      C2xAxis        c
      PseudoC2v      False
      FakeSym        False
      PhaseAdjust    False
      Abundance 1
      AsymmetricManifold: PH3_AgI Ground
        Initial       True
        EigenSearch   True
        LimitSearch   True
        AutoQConverge True
        UsePopParams  False
        AsymmetricTop: PH3_AgI v=0
          Symmetry A1
          Kmin     0
          Kmax     1
          A    6000
          BBar 626.013073572449
          DJK  0.00446205145062339
          DJ   3.18215214074445E-5
          AsymmetricTopNucleus: PH3_AgI I
            Spin   2.5
            AsNext False
            CHIzz -733.832427727861
        <N  ,K  |A|N,K> = K^2
        <N  ,K  |BBar|N,K> = N*(N+1)-K^2
        <N  ,K  |DJK|N,K> = -N*(N+1)*K^2
        <N  ,K  |DJ|N,K> = -N^2*(N+1)^2
      TransitionMoments: PH3_AgI <Ground|mu|Ground>
        CartesianTransitionMoment: PH3_AgI <v=0|a|v=0>
          Axis a
          Strength 1
        Symbolic Matrix Elements not available for <v=0|a|v=0>
  Species: PH3_109AgI
    Jmax   30
    Colour Red
    Concentration 1
    AsymmetricMolecule: PH3_109AgI PH3_109AgI
      nNuclei        1
      JAdjustSym     False
      BlockMatrix    True
      PointGroup     C2v
      Representation Ir
      SReduction     False
      eeWt           1
      eoWt           1
      oeWt           1
      ooWt           1
      C2zAxis        a
      C2xAxis        c
      PseudoC2v      False
      FakeSym        False
      PhaseAdjust    False
      Abundance 1
      AsymmetricManifold: PH3_109AgI Ground
        Initial       True
        EigenSearch   True
        LimitSearch   True
        AutoQConverge True
        UsePopParams  False
        AsymmetricTop: PH3_109AgI v=0
          Symmetry A1
          Kmin     0
          Kmax     1
          A    6000
          BBar 624.764234826775           Float
          DJK  0.00404400542963604        Float
          DJ   3.23809877095497E-5        Float
          AsymmetricTopNucleus: PH3_109AgI I
            Spin   2.5
            AsNext False
            CHIzz -734.53546473768           Float
        <N  ,K  |A|N,K> = K^2
        <N  ,K  |BBar|N,K> = N*(N+1)-K^2
        <N  ,K  |DJK|N,K> = -N*(N+1)*K^2
        <N  ,K  |DJ|N,K> = -N^2*(N+1)^2
      TransitionMoments: PH3_109AgI <Ground|mu|Ground>
        CartesianTransitionMoment: PH3_109AgI <v=0|a|v=0>
          Axis a
          Strength 1
        Symbolic Matrix Elements not available for <v=0|a|v=0>


Residuals before fit for PH3_109AgI for the Ground manifold
    J'S'  #'    J"S"  #"     Observed    Calculated      Obs-Calc StdDev 
  4.5 A1  3   3.5 A2  3     7487.0790     7487.0727        0.0063 1       .00032      0 : qR0,5(5)4.5,3.5 : PH3_109AgI v=0  6  0  6 4.5 - v=0  5  0  5 3.5 : s_1-2dCF3I_1-2dPhH3_Ag_46611_191211.csv - Overlays       :   1:<LineList>
  5.5 B2  4   4.5 B1  4     7489.1500     7489.1457        0.0043 1       .00029      0 : qR1,5(5)5.5,4.5 : PH3_109AgI v=0  6  1  6 5.5 - v=0  5  1  5 4.5 : s_1-2dCF3I_1-2dPhH3_Ag_46611_191211.csv - Overlays       :   2:<LineList>
  5.5 B1  4   4.5 B2  4     7489.1500     7489.1457        0.0043 1       .00029      0 : qR1,4(5)5.5,4.5 : PH3_109AgI v=0  6  1  5 5.5 - v=0  5  1  4 4.5 : s_1-2dCF3I_1-2dPhH3_Ag_46611_191211.csv - Overlays       :   3:<LineList>
  3.5 A1  3   2.5 A2  3     7491.6000     7491.5957        0.0043 1       .00026      0 : qR0,5(5)3.5,2.5 : PH3_109AgI v=0  6  0  6 3.5 - v=0  5  0  5 2.5 : s_1-2dCF3I_1-2dPhH3_Ag_46611_191211.csv - Overlays       :   4:<LineList>
  6.5 B2  3   5.5 B1  3     7494.2000     7494.2010       -0.0010 1       .00036      0 : qR1,5(5)6.5,5.5 : PH3_109AgI v=0  6  1  6 6.5 - v=0  5  1  5 5.5 : s_1-2dCF3I_1-2dPhH3_Ag_46611_191211.csv - Overlays       :   5:<LineList>
  6.5 B1  3   5.5 B2  3     7494.2000     7494.2010       -0.0010 1       .00036      0 : qR1,4(5)6.5,5.5 : PH3_109AgI v=0  6  1  5 6.5 - v=0  5  1  4 5.5 : s_1-2dCF3I_1-2dPhH3_Ag_46611_191211.csv - Overlays       :   6:<LineList>
  6.5 A1  2   5.5 A2  2     7496.4500     7496.4566       -0.0066 1       .00047      0 : qR0,5(5)6.5,5.5 : PH3_109AgI v=0  6  0  6 6.5 - v=0  5  0  5 5.5 : s_1-2dCF3I_1-2dPhH3_Ag_46611_191211.csv - Overlays       :   7:<LineList>
  7.5 A2  2   6.5 A1  2     8746.5870     8746.5740        0.0130 1       .00045      0 : qR0,6(6)7.5,6.5 : PH3_109AgI v=0  7  0  7 7.5 - v=0  6  0  6 6.5 : s_1-2dCF3I_1-2dPhH3_Ag_46611_191211.csv - Overlays       :   8:<LineList>
  9.5 A2  1   8.5 A1  1     8748.9000     8748.8986        0.0014 1       .0006      0 : qR0,6(6)9.5,8.5 : PH3_109AgI v=0  7  0  7 9.5 - v=0  6  0  6 8.5 : s_1-2dCF3I_1-2dPhH3_Ag_46611_191211.csv - Overlays        :   9:<LineList>
  9.5 B2  1   8.5 B1  1     8750.0650     8750.0752       -0.0102 1       .00045      0 : qR1,5(6)9.5,8.5 : PH3_109AgI v=0  7  1  6 9.5 - v=0  6  1  5 8.5 : s_1-2dCF3I_1-2dPhH3_Ag_46611_191211.csv - Overlays       :  10:<LineList>
  9.5 B1  1   8.5 B2  1     8750.0650     8750.0752       -0.0102 1       .00045      0 : qR1,6(6)9.5,8.5 : PH3_109AgI v=0  7  1  7 9.5 - v=0  6  1  6 8.5 : s_1-2dCF3I_1-2dPhH3_Ag_46611_191211.csv - Overlays       :  11:<LineList>
  6.5 A1  3   5.5 A2  3     9991.0000     9991.0178       -0.0178 1       .00029      0 : qR0,7(7)6.5,5.5 : PH3_109AgI v=0  8  0  8 6.5 - v=0  7  0  7 5.5 : s_1-2dCF3I_1-2dPhH3_Ag_46611_191211.csv - Overlays       :  12:<LineList>
  6.5 B2  5   5.5 B1  5     9991.4000     9991.3965        0.0035 1       .00022      0 : qR1,7(7)6.5,5.5 : PH3_109AgI v=0  8  1  8 6.5 - v=0  7  1  7 5.5 : s_1-2dCF3I_1-2dPhH3_Ag_46611_191211.csv - Overlays       :  13:<LineList>
  6.5 B1  5   5.5 B2  5     9991.4000     9991.3965        0.0035 1       .00022      0 : qR1,6(7)6.5,5.5 : PH3_109AgI v=0  8  1  7 6.5 - v=0  7  1  6 5.5 : s_1-2dCF3I_1-2dPhH3_Ag_46611_191211.csv - Overlays       :  14:<LineList>
  7.5 B2  4   6.5 B1  4     9992.1500     9992.1625       -0.0125 1       .00025      0 : qR1,7(7)7.5,6.5 : PH3_109AgI v=0  8  1  8 7.5 - v=0  7  1  7 6.5 : s_1-2dCF3I_1-2dPhH3_Ag_46611_191211.csv - Overlays       :  15:<LineList>
  7.5 B1  4   6.5 B2  4     9992.1500     9992.1625       -0.0125 1       .00025      0 : qR1,6(7)7.5,6.5 : PH3_109AgI v=0  8  1  7 7.5 - v=0  7  1  6 6.5 : s_1-2dCF3I_1-2dPhH3_Ag_46611_191211.csv - Overlays       :  16:<LineList>
  7.5 A1  2   6.5 A2  2     9992.6660     9992.6743       -0.0083 1       .00033      0 : qR0,7(7)7.5,6.5 : PH3_109AgI v=0  8  0  8 7.5 - v=0  7  0  7 6.5 : s_1-2dCF3I_1-2dPhH3_Ag_46611_191211.csv - Overlays       :  17:<LineList>
  5.5 B2  6   4.5 B1  6     9994.6870     9994.6881       -0.0011 1       .00019      0 : qR1,7(7)5.5,4.5 : PH3_109AgI v=0  8  1  8 5.5 - v=0  7  1  7 4.5 : s_1-2dCF3I_1-2dPhH3_Ag_46611_191211.csv - Overlays       :  18:<LineList>
  5.5 B1  6   4.5 B2  6     9994.6870     9994.6881       -0.0011 1       .00019      0 : qR1,6(7)5.5,4.5 : PH3_109AgI v=0  8  1  7 5.5 - v=0  7  1  6 4.5 : s_1-2dCF3I_1-2dPhH3_Ag_46611_191211.csv - Overlays       :  19:<LineList>
  8.5 B2  3   7.5 B1  3     9995.3000     9995.3022       -0.0022 1       .00029      0 : qR1,7(7)8.5,7.5 : PH3_109AgI v=0  8  1  8 8.5 - v=0  7  1  7 7.5 : s_1-2dCF3I_1-2dPhH3_Ag_46611_191211.csv - Overlays       :  20:<LineList>
  8.5 B1  3   7.5 B2  3     9995.3000     9995.3022       -0.0022 1       .00029      0 : qR1,6(7)8.5,7.5 : PH3_109AgI v=0  8  1  7 8.5 - v=0  7  1  6 7.5 : s_1-2dCF3I_1-2dPhH3_Ag_46611_191211.csv - Overlays       :  21:<LineList>
  8.5 A1  2   7.5 A2  2     9996.3500     9996.3355        0.0145 1       .00038      0 : qR0,7(7)8.5,7.5 : PH3_109AgI v=0  8  0  8 8.5 - v=0  7  0  7 7.5 : s_1-2dCF3I_1-2dPhH3_Ag_46611_191211.csv - Overlays       :  22:<LineList>
 10.5 A1  1   9.5 A2  1     9997.9380     9997.9298        0.0082 1       .00048      0 : qR0,7(7)10.5,9.5 : PH3_109AgI v=0  8  0  8 10.5 - v=0  7  0  7 9.5 : s_1-2dCF3I_1-2dPhH3_Ag_46611_191211.csv - Overlays     :  23:<LineList>
  9.5 B2  2   8.5 B1  2     9998.5000     9998.4996        0.0004 1       .00033      0 : qR1,7(7)9.5,8.5 : PH3_109AgI v=0  8  1  8 9.5 - v=0  7  1  7 8.5 : s_1-2dCF3I_1-2dPhH3_Ag_46611_191211.csv - Overlays       :  24:<LineList>
  9.5 B1  2   8.5 B2  2     9998.5000     9998.4996        0.0004 1       .00033      0 : qR1,6(7)9.5,8.5 : PH3_109AgI v=0  8  1  7 9.5 - v=0  7  1  6 8.5 : s_1-2dCF3I_1-2dPhH3_Ag_46611_191211.csv - Overlays       :  25:<LineList>
 10.5 B2  1   9.5 B1  1     9998.7000     9998.7171       -0.0171 1       .00037      0 : qR1,7(7)10.5,9.5 : PH3_109AgI v=0  8  1  8 10.5 - v=0  7  1  7 9.5 : s_1-2dCF3I_1-2dPhH3_Ag_46611_191211.csv - Overlays     :  26:<LineList>
 10.5 B1  1   9.5 B2  1     9998.7000     9998.7171       -0.0171 1       .00037      0 : qR1,6(7)10.5,9.5 : PH3_109AgI v=0  8  1  7 10.5 - v=0  7  1  6 9.5 : s_1-2dCF3I_1-2dPhH3_Ag_46611_191211.csv - Overlays     :  27:<LineList>
  9.5 A1  1   8.5 A2  1     9999.3000     9999.3056       -0.0056 1       .00043      0 : qR0,7(7)9.5,8.5 : PH3_109AgI v=0  8  0  8 9.5 - v=0  7  0  7 8.5 : s_1-2dCF3I_1-2dPhH3_Ag_46611_191211.csv - Overlays       :  28:<LineList>
  7.5 A2  3   6.5 A1  3    11241.7190    11241.7217       -0.0027 1       .00023      0 : qR0,8(8)7.5,6.5 : PH3_109AgI v=0  9  0  9 7.5 - v=0  8  0  8 6.5 : s_1-2dCF3I_1-2dPhH3_Ag_46611_191211.csv - Overlays       :  29:<LineList>
  7.5 B2  5   6.5 B1  5    11241.9000    11241.9014       -0.0014 1       .00017      0 : qR1,7(8)7.5,6.5 : PH3_109AgI v=0  9  1  8 7.5 - v=0  8  1  7 6.5 : s_1-2dCF3I_1-2dPhH3_Ag_46611_191211.csv - Overlays       :  30:<LineList>
  7.5 B1  5   6.5 B2  5    11241.9000    11241.9014       -0.0014 1       .00017      0 : qR1,8(8)7.5,6.5 : PH3_109AgI v=0  9  1  9 7.5 - v=0  8  1  8 6.5 : s_1-2dCF3I_1-2dPhH3_Ag_46611_191211.csv - Overlays       :  31:<LineList>
  8.5 B2  4   7.5 B1  4    11242.6500    11242.6424        0.0076 1       .0002      0 : qR1,7(8)8.5,7.5 : PH3_109AgI v=0  9  1  8 8.5 - v=0  8  1  7 7.5 : s_1-2dCF3I_1-2dPhH3_Ag_46611_191211.csv - Overlays        :  32:<LineList>
  8.5 B1  4   7.5 B2  4    11242.6500    11242.6424        0.0076 1       .0002      0 : qR1,8(8)8.5,7.5 : PH3_109AgI v=0  9  1  9 8.5 - v=0  8  1  8 7.5 : s_1-2dCF3I_1-2dPhH3_Ag_46611_191211.csv - Overlays        :  33:<LineList>
  8.5 A2  2   7.5 A1  2    11243.0620    11243.0727       -0.0107 1       .00026      0 : qR0,8(8)8.5,7.5 : PH3_109AgI v=0  9  0  9 8.5 - v=0  8  0  8 7.5 : s_1-2dCF3I_1-2dPhH3_Ag_46611_191211.csv - Overlays       :  34:<LineList>
  6.5 A2  3   5.5 A1  3    11243.4790    11243.4895       -0.0105 1       .0002      0 : qR0,8(8)6.5,5.5 : PH3_109AgI v=0  9  0  9 6.5 - v=0  8  0  8 5.5 : s_1-2dCF3I_1-2dPhH3_Ag_46611_191211.csv - Overlays        :  35:<LineList>
  9.5 B2  3   8.5 B1  3    11245.2000    11245.1861        0.0139 1       .00022      0 : qR1,7(8)9.5,8.5 : PH3_109AgI v=0  9  1  8 9.5 - v=0  8  1  7 8.5 : s_1-2dCF3I_1-2dPhH3_Ag_46611_191211.csv - Overlays       :  36:<LineList>
  9.5 B1  3   8.5 B2  3    11245.2000    11245.1861        0.0139 1       .00022      0 : qR1,8(8)9.5,8.5 : PH3_109AgI v=0  9  1  9 9.5 - v=0  8  1  8 8.5 : s_1-2dCF3I_1-2dPhH3_Ag_46611_191211.csv - Overlays       :  37:<LineList>
  9.5 A2  2   8.5 A1  2    11245.9500    11245.9418        0.0082 1       .00029      0 : qR0,8(8)9.5,8.5 : PH3_109AgI v=0  9  0  9 9.5 - v=0  8  0  8 8.5 : s_1-2dCF3I_1-2dPhH3_Ag_46611_191211.csv - Overlays       :  38:<LineList>
 11.5 A2  1  10.5 A1  1    11247.1000    11247.0913        0.0087 1       .00036      0 : qR0,8(8)11.5,10.5 : PH3_109AgI v=0  9  0  9 11.5 - v=0  8  0  8 10.5 : s_1-2dCF3I_1-2dPhH3_Ag_46611_191211.csv - Overlays   :  39:<LineList>
 11.5 B2  1  10.5 B1  1    11247.6500    11247.6317        0.0183 1       .00027      0 : qR1,7(8)11.5,10.5 : PH3_109AgI v=0  9  1  8 11.5 - v=0  8  1  7 10.5 : s_1-2dCF3I_1-2dPhH3_Ag_46611_191211.csv - Overlays   :  40:<LineList>
 11.5 B1  1  10.5 B2  1    11247.6500    11247.6317        0.0183 1       .00027      0 : qR1,8(8)11.5,10.5 : PH3_109AgI v=0  9  1  9 11.5 - v=0  8  1  8 10.5 : s_1-2dCF3I_1-2dPhH3_Ag_46611_191211.csv - Overlays   :  41:<LineList>
 10.5 B2  2   9.5 B1  2    11247.6500    11247.6523       -0.0023 1       .00025      0 : qR1,7(8)10.5,9.5 : PH3_109AgI v=0  9  1  8 10.5 - v=0  8  1  7 9.5 : s_1-2dCF3I_1-2dPhH3_Ag_46611_191211.csv - Overlays     :  42:<LineList>
 10.5 B1  2   9.5 B2  2    11247.6500    11247.6523       -0.0023 1       .00025      0 : qR1,8(8)10.5,9.5 : PH3_109AgI v=0  9  1  9 10.5 - v=0  8  1  8 9.5 : s_1-2dCF3I_1-2dPhH3_Ag_46611_191211.csv - Overlays     :  43:<LineList>
 10.5 A2  1   9.5 A1  1    11248.2000    11248.2072       -0.0072 1       .00032      0 : qR0,8(8)10.5,9.5 : PH3_109AgI v=0  9  0  9 10.5 - v=0  8  0  8 9.5 : s_1-2dCF3I_1-2dPhH3_Ag_46611_191211.csv - Overlays     :  44:<LineList>
  9.5 B2  4   8.5 B1  4    12492.8010    12492.7976        0.0034 1       .00014      0 : qR1,9(9)9.5,8.5 : PH3_109AgI v=0 10  1 10 9.5 - v=0  9  1  9 8.5 : s_1-2dCF3I_1-2dPhH3_Ag_46611_191211.csv - Overlays       :  45:<LineList>
  9.5 B1  4   8.5 B2  4    12492.8010    12492.7976        0.0034 1       .00014      0 : qR1,8(9)9.5,8.5 : PH3_109AgI v=0 10  1  9 9.5 - v=0  9  1  8 8.5 : s_1-2dCF3I_1-2dPhH3_Ag_46611_191211.csv - Overlays       :  46:<LineList>
  9.5 A1  2   8.5 A2  2    12493.1650    12493.1629        0.0021 1       .00018      0 : qR0,9(9)9.5,8.5 : PH3_109AgI v=0 10  0 10 9.5 - v=0  9  0  9 8.5 : s_1-2dCF3I_1-2dPhH3_Ag_46611_191211.csv - Overlays       :  47:<LineList>
  7.5 B1  6   6.5 B2  6    12494.0500    12494.0425        0.0075 1       .00011      0 : qR1,8(9)7.5,6.5 : PH3_109AgI v=0 10  1  9 7.5 - v=0  9  1  8 6.5 : s_1-2dCF3I_1-2dPhH3_Ag_46611_191211.csv - Overlays       :  48:<LineList>
  7.5 B2  6   6.5 B1  6    12494.0500    12494.0425        0.0075 1       .00011      0 : qR1,9(9)7.5,6.5 : PH3_109AgI v=0 10  1 10 7.5 - v=0  9  1  9 6.5 : s_1-2dCF3I_1-2dPhH3_Ag_46611_191211.csv - Overlays       :  49:<LineList>
 10.5 B1  3   9.5 B2  3    12494.9000    12494.8945        0.0055 1       .00016      0 : qR1,8(9)10.5,9.5 : PH3_109AgI v=0 10  1  9 10.5 - v=0  9  1  8 9.5 : s_1-2dCF3I_1-2dPhH3_Ag_46611_191211.csv - Overlays     :  50:<LineList>
 10.5 B2  3   9.5 B1  3    12494.9000    12494.8945        0.0055 1       .00016      0 : qR1,9(9)10.5,9.5 : PH3_109AgI v=0 10  1 10 10.5 - v=0  9  1  9 9.5 : s_1-2dCF3I_1-2dPhH3_Ag_46611_191211.csv - Overlays     :  51:<LineList>
 12.5 A1  1  11.5 A2  1    12496.3500    12496.3347        0.0153 1       .00025      0 : qR0,9(9)12.5,11.5 : PH3_109AgI v=0 10  0 10 12.5 - v=0  9  0  9 11.5 : s_1-2dCF3I_1-2dPhH3_Ag_46611_191211.csv - Overlays   :  52:<LineList>
 12.5 B1  1  11.5 B2  1    12496.7000    12496.7098       -0.0098 1       .00019      0 : qR1,8(9)12.5,11.5 : PH3_109AgI v=0 10  1  9 12.5 - v=0  9  1  8 11.5 : s_1-2dCF3I_1-2dPhH3_Ag_46611_191211.csv - Overlays   :  53:<LineList>
 12.5 B2  1  11.5 B1  1    12496.7000    12496.7098       -0.0098 1       .00019      0 : qR1,9(9)12.5,11.5 : PH3_109AgI v=0 10  1 10 12.5 - v=0  9  1  9 11.5 : s_1-2dCF3I_1-2dPhH3_Ag_46611_191211.csv - Overlays   :  54:<LineList>
 11.5 B1  2  10.5 B2  2    12496.8460    12496.8483       -0.0023 1       .00017      0 : qR1,8(9)11.5,10.5 : PH3_109AgI v=0 10  1  9 11.5 - v=0  9  1  8 10.5 : s_1-2dCF3I_1-2dPhH3_Ag_46611_191211.csv - Overlays   :  55:<LineList>
 11.5 B2  2  10.5 B1  2    12496.8460    12496.8483       -0.0023 1       .00017      0 : qR1,9(9)11.5,10.5 : PH3_109AgI v=0 10  1 10 11.5 - v=0  9  1  9 10.5 : s_1-2dCF3I_1-2dPhH3_Ag_46611_191211.csv - Overlays   :  56:<LineList>
 11.5 A1  1  10.5 A2  1    12497.2500    12497.2579       -0.0079 1       .00022      0 : qR0,9(9)11.5,10.5 : PH3_109AgI v=0 10  0 10 11.5 - v=0  9  0  9 10.5 : s_1-2dCF3I_1-2dPhH3_Ag_46611_191211.csv - Overlays   :  57:<LineList>
  9.5 B2  5   8.5 B1  5    13742.1180    13742.1217       -0.0037 1       8.3e-5      0 : qR1,9(10)9.5,8.5 : PH3_109AgI v=0 11  1 10 9.5 - v=0 10  1  9 8.5 : s_1-2dCF3I_1-2dPhH3_Ag_46611_191211.csv - Overlays      :  58:<LineList>
  9.5 A2  3   8.5 A1  3    13742.1180    13742.1171        0.0009 1       .00011      0 : qR0,10(10)9.5,8.5 : PH3_109AgI v=0 11  0 11 9.5 - v=0 10  0 10 8.5 : s_1-2dCF3I_1-2dPhH3_Ag_46611_191211.csv - Overlays     :  59:<LineList>
  9.5 B1  5   8.5 B2  5    13742.1180    13742.1217       -0.0037 1       8.3e-5      0 : qR1,10(10)9.5,8.5 : PH3_109AgI v=0 11  1 11 9.5 - v=0 10  1 10 8.5 : s_1-2dCF3I_1-2dPhH3_Ag_46611_191211.csv - Overlays     :  60:<LineList>
 10.5 B2  4   9.5 B1  4    13742.7500    13742.7473        0.0027 1       9.2e-5      0 : qR1,9(10)10.5,9.5 : PH3_109AgI v=0 11  1 10 10.5 - v=0 10  1  9 9.5 : s_1-2dCF3I_1-2dPhH3_Ag_46611_191211.csv - Overlays    :  61:<LineList>
 10.5 B1  4   9.5 B2  4    13742.7500    13742.7473        0.0027 1       9.2e-5      0 : qR1,10(10)10.5,9.5 : PH3_109AgI v=0 11  1 11 10.5 - v=0 10  1 10 9.5 : s_1-2dCF3I_1-2dPhH3_Ag_46611_191211.csv - Overlays   :  62:<LineList>
 10.5 A2  2   9.5 A1  2    13743.0610    13743.0639       -0.0029 1       .00012      0 : qR0,10(10)10.5,9.5 : PH3_109AgI v=0 11  0 11 10.5 - v=0 10  0 10 9.5 : s_1-2dCF3I_1-2dPhH3_Ag_46611_191211.csv - Overlays   :  63:<LineList>
  8.5 A2  3   7.5 A1  3    13743.2500    13743.2481        0.0019 1       9.8e-5      0 : qR0,10(10)8.5,7.5 : PH3_109AgI v=0 11  0 11 8.5 - v=0 10  0 10 7.5 : s_1-2dCF3I_1-2dPhH3_Ag_46611_191211.csv - Overlays     :  64:<LineList>
  8.5 B2  6   7.5 B1  6    13743.6500    13743.6636       -0.0136 1       7.5e-5      0 : qR1,9(10)8.5,7.5 : PH3_109AgI v=0 11  1 10 8.5 - v=0 10  1  9 7.5 : s_1-2dCF3I_1-2dPhH3_Ag_46611_191211.csv - Overlays      :  65:<LineList>
  8.5 B1  6   7.5 B2  6    13743.6500    13743.6636       -0.0136 1       7.5e-5      0 : qR1,10(10)8.5,7.5 : PH3_109AgI v=0 11  1 11 8.5 - v=0 10  1 10 7.5 : s_1-2dCF3I_1-2dPhH3_Ag_46611_191211.csv - Overlays     :  66:<LineList>
 11.5 B2  3  10.5 B1  3    13744.5000    13744.5026       -0.0026 1       .0001      0 : qR1,9(10)11.5,10.5 : PH3_109AgI v=0 11  1 10 11.5 - v=0 10  1  9 10.5 : s_1-2dCF3I_1-2dPhH3_Ag_46611_191211.csv - Overlays   :  67:<LineList>
 11.5 B1  3  10.5 B2  3    13744.5000    13744.5026       -0.0026 1       .0001      0 : qR1,10(10)11.5,10.5 : PH3_109AgI v=0 11  1 11 11.5 - v=0 10  1 10 10.5 : s_1-2dCF3I_1-2dPhH3_Ag_46611_191211.csv - Overlays  :  68:<LineList>
 11.5 A2  2  10.5 A1  2    13744.9500    13744.9648       -0.0148 1       .00013      0 : qR0,10(10)11.5,10.5 : PH3_109AgI v=0 11  0 11 11.5 - v=0 10  0 10 10.5 : s_1-2dCF3I_1-2dPhH3_Ag_46611_191211.csv - Overlays :  69:<LineList>
 13.5 B2  1  12.5 B1  1    13745.9000    13745.8899        0.0101 1       .00012      0 : qR1,9(10)13.5,12.5 : PH3_109AgI v=0 11  1 10 13.5 - v=0 10  1  9 12.5 : s_1-2dCF3I_1-2dPhH3_Ag_46611_191211.csv - Overlays  :  70:<LineList>
 13.5 B1  1  12.5 B2  1    13745.9000    13745.8899        0.0101 1       .00012      0 : qR1,10(10)13.5,12.5 : PH3_109AgI v=0 11  1 11 13.5 - v=0 10  1 10 12.5 : s_1-2dCF3I_1-2dPhH3_Ag_46611_191211.csv - Overlays :  71:<LineList>
 12.5 B2  2  11.5 B1  2    13746.1000    13746.0851        0.0149 1       .00011      0 : qR1,9(10)12.5,11.5 : PH3_109AgI v=0 11  1 10 12.5 - v=0 10  1  9 11.5 : s_1-2dCF3I_1-2dPhH3_Ag_46611_191211.csv - Overlays  :  72:<LineList>
 12.5 B1  2  11.5 B2  2    13746.1000    13746.0851        0.0149 1       .00011      0 : qR1,10(10)12.5,11.5 : PH3_109AgI v=0 11  1 11 12.5 - v=0 10  1 10 11.5 : s_1-2dCF3I_1-2dPhH3_Ag_46611_191211.csv - Overlays :  73:<LineList>
 12.5 A2  1  11.5 A1  1    13746.4000    13746.4070       -0.0070 1       .00014      0 : qR0,10(10)12.5,11.5 : PH3_109AgI v=0 11  0 11 12.5 - v=0 10  0 10 11.5 : s_1-2dCF3I_1-2dPhH3_Ag_46611_191211.csv - Overlays :  74:<LineList>
 10.5 A1  3   9.5 A2  3    14992.0500    14992.0315        0.0185 1       6.6e-5      0 : qR0,11(11)10.5,9.5 : PH3_109AgI v=0 12  0 12 10.5 - v=0 11  0 11 9.5 : s_1-2dCF3I_1-2dPhH3_Ag_46611_191211.csv - Overlays   :  75:<LineList>
 11.5 B1  4  10.5 B2  4    14992.5500    14992.5599       -0.0099 1       5.5e-5      0 : qR1,10(11)11.5,10.5 : PH3_109AgI v=0 12  1 11 11.5 - v=0 11  1 10 10.5 : s_1-2dCF3I_1-2dPhH3_Ag_46611_191211.csv - Overlays :  76:<LineList>
 11.5 B2  4  10.5 B1  4    14992.5500    14992.5599       -0.0099 1       5.5e-5      0 : qR1,11(11)11.5,10.5 : PH3_109AgI v=0 12  1 12 11.5 - v=0 11  1 11 10.5 : s_1-2dCF3I_1-2dPhH3_Ag_46611_191211.csv - Overlays :  77:<LineList>
 11.5 A1  2  10.5 A2  2    14992.8500    14992.8408        0.0092 1       7.2e-5      0 : qR0,11(11)11.5,10.5 : PH3_109AgI v=0 12  0 12 11.5 - v=0 11  0 11 10.5 : s_1-2dCF3I_1-2dPhH3_Ag_46611_191211.csv - Overlays :  78:<LineList>
  9.5 A1  3   8.5 A2  3    14992.9500    14992.9660       -0.0160 1       6e-5      0 : qR0,11(11)9.5,8.5 : PH3_109AgI v=0 12  0 12 9.5 - v=0 11  0 11 8.5 : s_1-2dCF3I_1-2dPhH3_Ag_46611_191211.csv - Overlays       :  79:<LineList>
  9.5 B1  6   8.5 B2  6    14993.2500    14993.2506       -0.0006 1       4.6e-5      0 : qR1,10(11)9.5,8.5 : PH3_109AgI v=0 12  1 11 9.5 - v=0 11  1 10 8.5 : s_1-2dCF3I_1-2dPhH3_Ag_46611_191211.csv - Overlays     :  80:<LineList>
  9.5 B2  6   8.5 B1  6    14993.2500    14993.2506       -0.0006 1       4.6e-5      0 : qR1,11(11)9.5,8.5 : PH3_109AgI v=0 12  1 12 9.5 - v=0 11  1 11 8.5 : s_1-2dCF3I_1-2dPhH3_Ag_46611_191211.csv - Overlays     :  81:<LineList>
 12.5 B2  3  11.5 B1  3    14994.0500    14994.0491        0.0009 1       6.1e-5      0 : qR1,11(11)12.5,11.5 : PH3_109AgI v=0 12  1 12 12.5 - v=0 11  1 11 11.5 : s_1-2dCF3I_1-2dPhH3_Ag_46611_191211.csv - Overlays :  82:<LineList>
 12.5 B1  3  11.5 B2  3    14994.0500    14994.0491        0.0009 1       6.1e-5      0 : qR1,10(11)12.5,11.5 : PH3_109AgI v=0 12  1 11 12.5 - v=0 11  1 10 11.5 : s_1-2dCF3I_1-2dPhH3_Ag_46611_191211.csv - Overlays :  83:<LineList>
 12.5 B2  4  11.5 B1  4    16242.2780    16242.2764        0.0016 1       3.1e-5      0 : qR1,11(12)12.5,11.5 : PH3_109AgI v=0 13  1 12 12.5 - v=0 12  1 11 11.5 : s_1-2dCF3I_1-2dPhH3_Ag_46611_191211.csv - Overlays :  84:<LineList>
 12.5 B1  4  11.5 B2  4    16242.2780    16242.2764        0.0016 1       3.1e-5      0 : qR1,12(12)12.5,11.5 : PH3_109AgI v=0 13  1 13 12.5 - v=0 12  1 12 11.5 : s_1-2dCF3I_1-2dPhH3_Ag_46611_191211.csv - Overlays :  85:<LineList>
 10.5 B2  6   9.5 B1  6    16242.8000    16242.8077       -0.0077 1       2.6e-5      0 : qR1,11(12)10.5,9.5 : PH3_109AgI v=0 13  1 12 10.5 - v=0 12  1 11 9.5 : s_1-2dCF3I_1-2dPhH3_Ag_46611_191211.csv - Overlays   :  86:<LineList>
 10.5 B1  6   9.5 B2  6    16242.8000    16242.8077       -0.0077 1       2.6e-5      0 : qR1,12(12)10.5,9.5 : PH3_109AgI v=0 13  1 13 10.5 - v=0 12  1 12 9.5 : s_1-2dCF3I_1-2dPhH3_Ag_46611_191211.csv - Overlays   :  87:<LineList>
 15.5 A2  1  14.5 A1  1    16244.3000    16244.3114       -0.0114 1       5.1e-5      0 : qR0,12(12)15.5,14.5 : PH3_109AgI v=0 13  0 13 15.5 - v=0 12  0 12 14.5 : s_1-2dCF3I_1-2dPhH3_Ag_46611_191211.csv - Overlays :  88:<LineList>
 15.5 B2  1  14.5 B1  1    16244.4240    16244.4226        0.0014 1       3.9e-5      0 : qR1,11(12)15.5,14.5 : PH3_109AgI v=0 13  1 12 15.5 - v=0 12  1 11 14.5 : s_1-2dCF3I_1-2dPhH3_Ag_46611_191211.csv - Overlays :  89:<LineList>
 15.5 B1  1  14.5 B2  1    16244.4240    16244.4226        0.0014 1       3.9e-5      0 : qR1,12(12)15.5,14.5 : PH3_109AgI v=0 13  1 13 15.5 - v=0 12  1 12 14.5 : s_1-2dCF3I_1-2dPhH3_Ag_46611_191211.csv - Overlays :  90:<LineList>
 14.5 B2  2  13.5 B1  2    16244.6500    16244.6495        0.0005 1       3.6e-5      0 : qR1,11(12)14.5,13.5 : PH3_109AgI v=0 13  1 12 14.5 - v=0 12  1 11 13.5 : s_1-2dCF3I_1-2dPhH3_Ag_46611_191211.csv - Overlays :  91:<LineList>
 14.5 B1  2  13.5 B2  2    16244.6500    16244.6495        0.0005 1       3.6e-5      0 : qR1,12(12)14.5,13.5 : PH3_109AgI v=0 13  1 13 14.5 - v=0 12  1 12 13.5 : s_1-2dCF3I_1-2dPhH3_Ag_46611_191211.csv - Overlays :  92:<LineList>
 14.5 A2  1  13.5 A1  1    16244.9000    16244.8825        0.0175 1       4.7e-5      0 : qR0,12(12)14.5,13.5 : PH3_109AgI v=0 13  0 13 14.5 - v=0 12  0 12 13.5 : s_1-2dCF3I_1-2dPhH3_Ag_46611_191211.csv - Overlays :  93:<LineList>

93 Observations,  4 Parameters
Initial Average Error: 0.00903243296267265
Predicted New Error:   0.00903243296266914
Parameters:
  # Old                 New                 Std Dev   Change/Std Sens    Summary              Name
  1 624.764234826775    624.764234828064    .0001674     0.0000  1.14e-5 624.76423(17)        PH3_109AgI v=0 BBar
  2 .00404400542963604  .00404400595617494  .00010409    0.0000  1.35e-5 4.04(10)e-3          PH3_109AgI v=0 DJK
  3 3.23809877095497e-5 3.23809916546963e-5 6.4224e-7    0.0000  4.74e-8 3.238(64)e-5         PH3_109AgI v=0 DJ
  4 -734.53546473768    -734.535465186404   .26706489    0.0000  .061212 -734.54(27)          PH3_109AgI I CHIzz

Correlation Matrix
       1       2       3       4
  1   1.000
  2   0.366   1.000
  3   0.850  -0.086   1.000
  4  -0.270  -0.024  -0.223   1.000
